# Supplementary material for: Understanding the impacts of sodium silicate on water quality and iron oxide particles
Source: Royal Society of Chemistry journal article supplement (doi:10.1039/c9ew00257j), 2019-01-01
Supplement: c9ew00257j9.pdf [file c9ew00257j9.pdf]

1 UNDERSTANDING THE IMPACTS OF SODIUM SILICATE ON WATER QUALITY AND  
2 IRON OXIDE PARTICLES

3 ELECTRONIC SUPPLEMENTARY INFORMATION

4 Bofu Li<sup>1</sup>, Benjamin F. Trueman<sup>1</sup>, Mohammad Shahedur Rahman<sup>1,2</sup>, Yaohuan Gao<sup>1</sup>, Yuri Park<sup>1,3</sup>  
5 and Graham A. Gagnon<sup>1, §</sup>  
6

7 1 Centre for Water Resources Studies, Dalhousie University, Halifax, NS

8 Department of Civil & Resource Engineering

9 Dalhousie University

10 Halifax, Nova Scotia, Canada

11 2 Civil Engineering Department

12 College of Engineering

13 Al Imam Mohammad Ibn Saud Islamic University

14 Riyadh, Saudi Arabia

15 3 Department of Green Chemistry

16 School of Engineering Science

17 Lappeenranta-Lahti University of Technology LUT, Mikkeli, Finland

18

19 Submitted to Environmental Science: Water Research & Technology

20 June, 2019

21 § **Corresponding Author:** Dr. G. A. Gagnon, 1360 Barrington St., Dalhousie University,

22 Halifax, NS, B3H 4R2 e-mail [graham.gagnon@dal.ca](mailto:graham.gagnon@dal.ca), Tel: 902.494.3268, Fax 902.494.3108

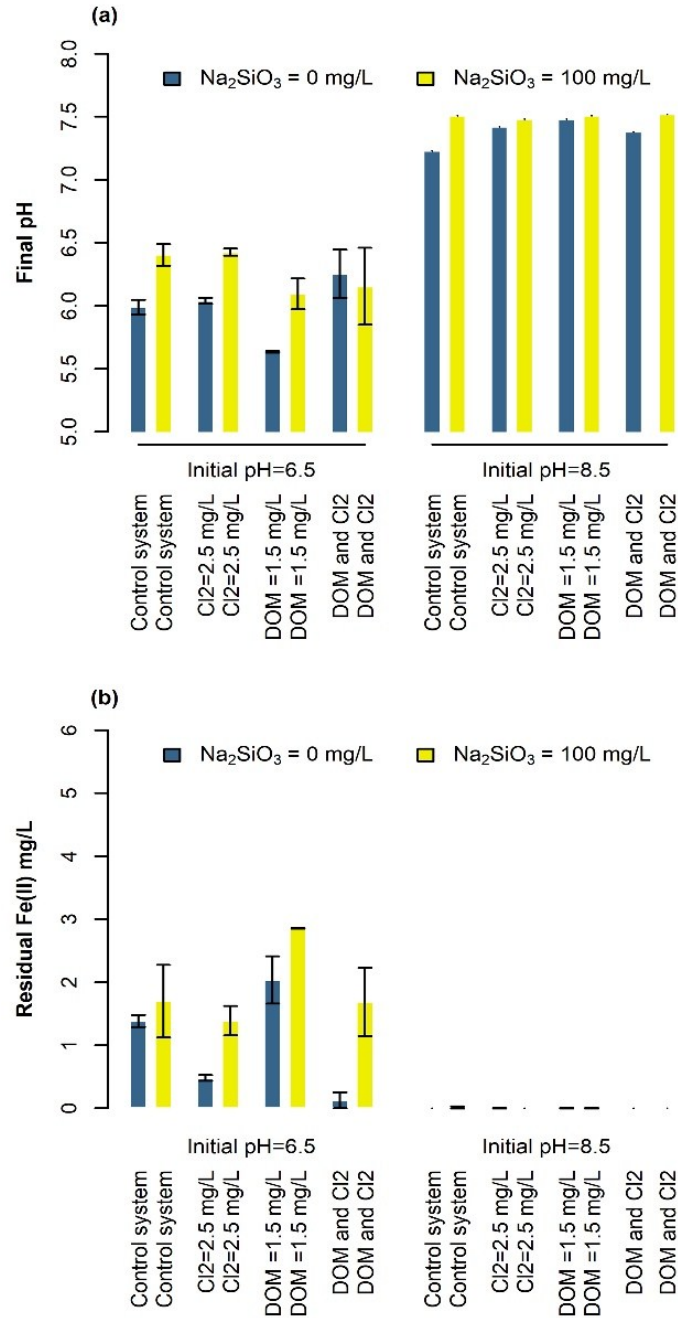

23

24 **Figure S1.** Final (a) pH and (b) residual Fe (II) after 3.5 hour of reaction.

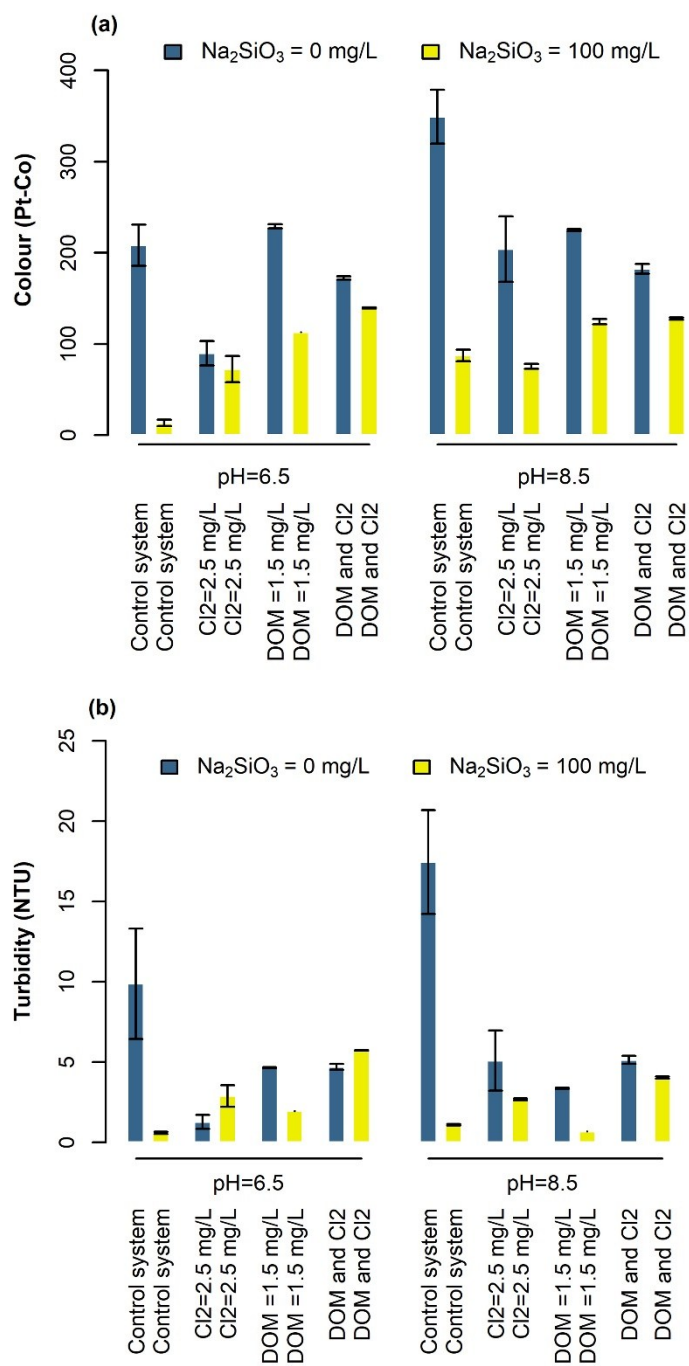

25

26 **Figure S2.** Effect of sodium silicate on the formation of iron particle suspension (a) colour and  
 27 (b) turbidity in NaHCO<sub>3</sub> buffered synthetic water at 21±1°C.

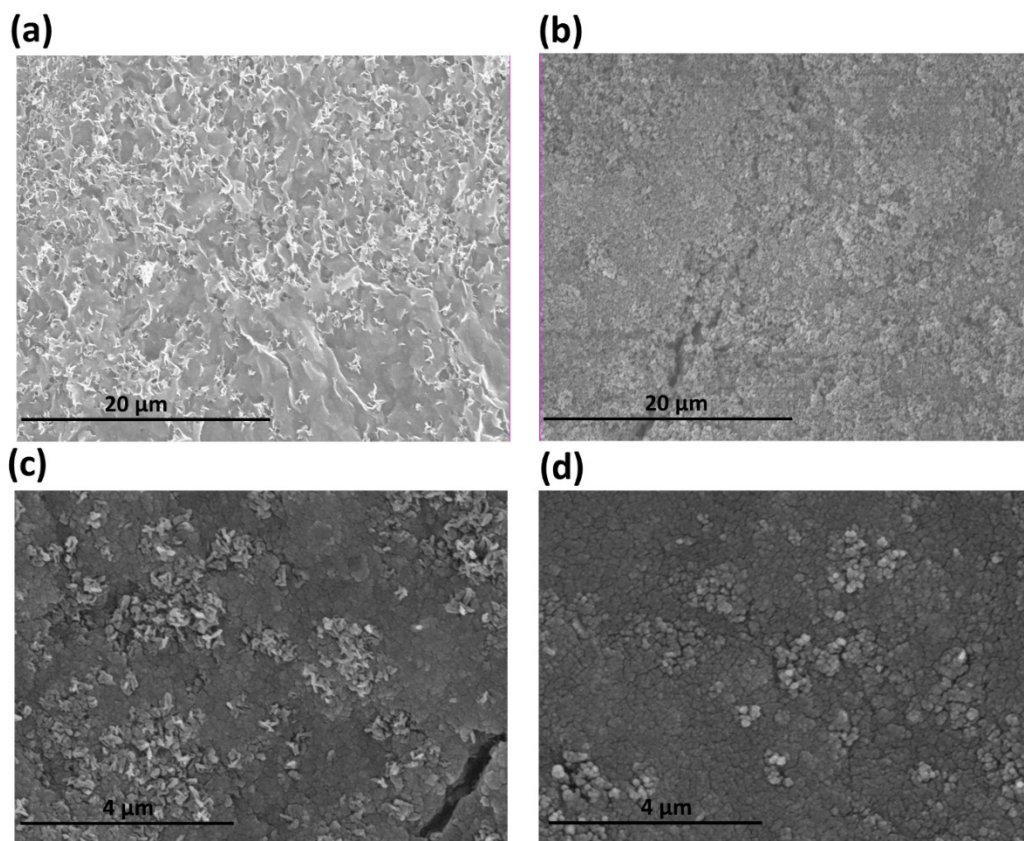

28

29 **Figure S3.** Scanning electron microscopy-energy dispersive X-ray spectroscopies (SEM-EDS)  
30 of (a) control system (Fe); (b) system in the presence of sodium silicate (60 mg/L) (Fe-Si); (c)  
31 system in the presence of DOM (3 mg TOC/L) and chlorine (2.5 mg/L) (Fe-DOM-Cl<sub>2</sub>); and (d)  
32 system in the presence of DOM (3 mg TOC/L), chlorine (2.5 mg/L) and sodium silicate (60  
33 mg/L) (Fe-DOM-Cl<sub>2</sub>-Si).

34

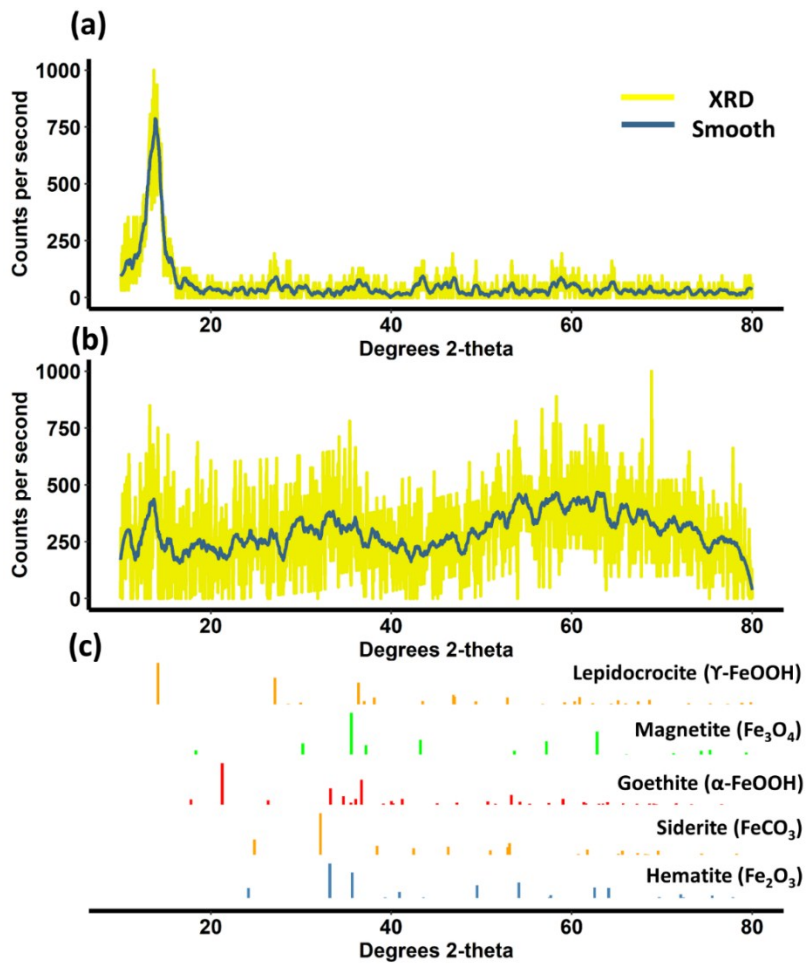

35

36 **Figure S4.** X-ray powder diffraction (XRD) of (a) control system (Fe); (b) system in the  
 37 presence of sodium silicate (60 mg/L) (Fe-Si) and (c) XRD standard curves.

38

39 Characteristics of Goethite and Magnetite

40 Goethite (FeOOH):

41 Particle size distribution in the range of 0.314-7.64  $\mu\text{m}$  (>1%) using laser diffraction

42 Surface area 10.97  $\text{m}^2/\text{g}$  using BET- $\text{N}_2$

43 Magnetite ( $\text{Fe}_3\text{O}_4$ ):

44 Particle size distribution in the range of 0.991-35.3  $\mu\text{m}$  (>1%) using laser diffraction

45 Surface area 6.77  $\text{m}^2/\text{g}$  using BET- $\text{N}_2$

46

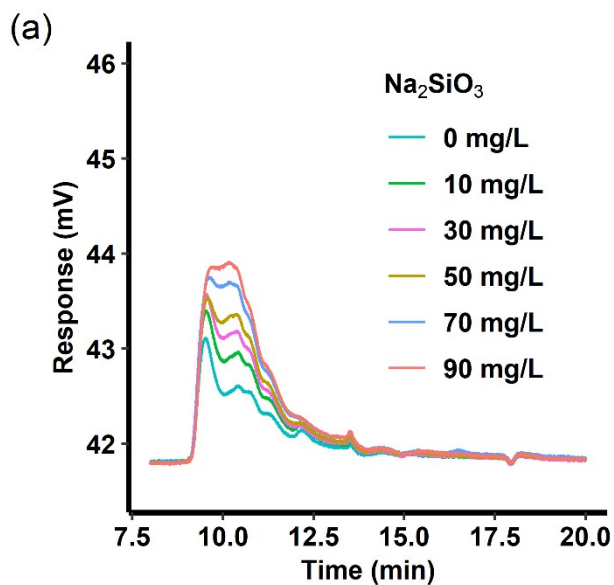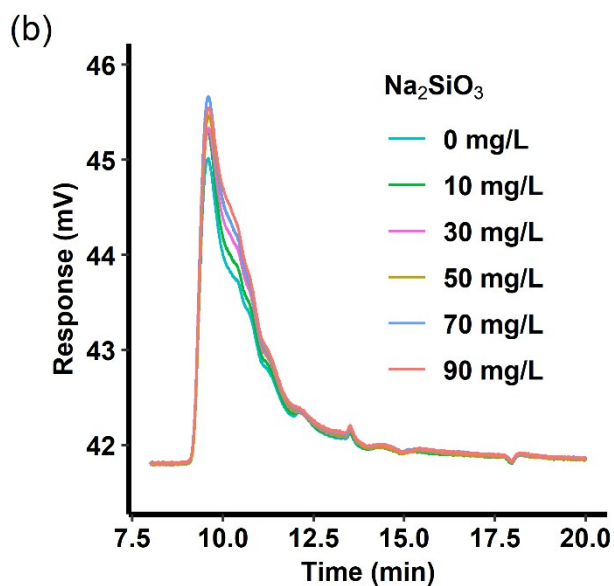

49 **Figure S5.** Molecular weight distribution of residual DOM at sodium silicate dosages of 0-90  
50 mg/L with (a) goethite and (b) magnetite using high performance size exclusion chromatography  
51 (SEC-HPLC).

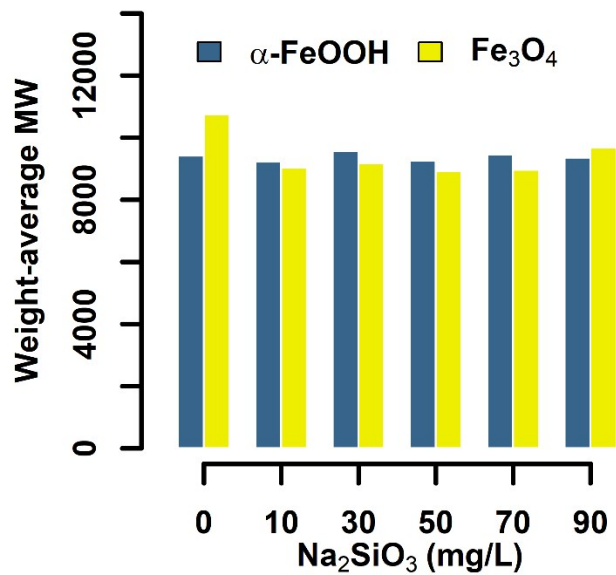

53

54 **Figure S6.** Weight-average molecular weight of matter in the presence of 0.3 g/L of goethite or  
55 magnetite. Data summarized from high performance size exclusion chromatogram results.

56



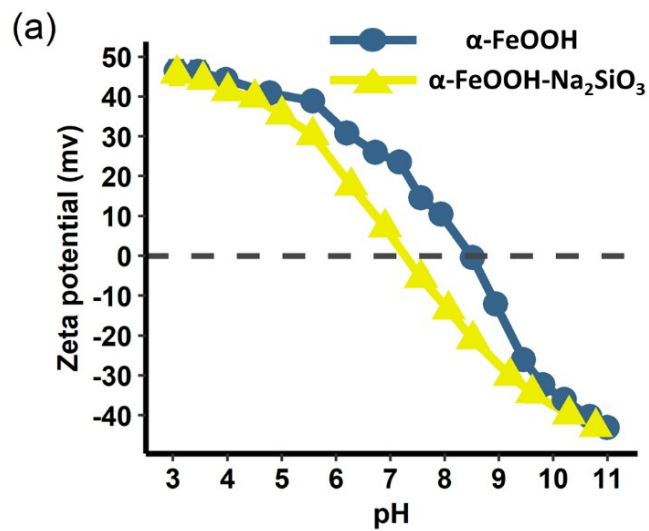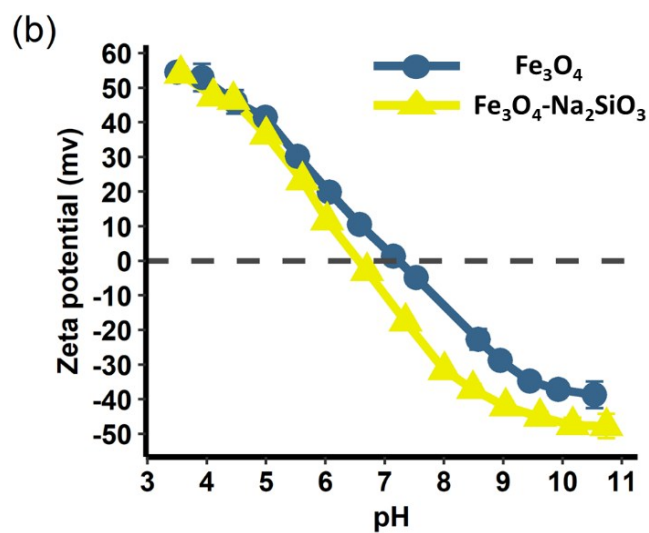

57

58 **Figure S7.** Effect of sodium silicate (20 mg/L) on the Zeta ( $\zeta$ -) potential of (a) goethite (0.3  
 59 mg/L) and (b) magnetite (0.3 mg/L) at pH 6.5 and  $21 \pm 1^\circ\text{C}$  in a 0.01M NaCl solution.

60
