# Supplementary figures and images for: Understanding the impacts of sodium silicate on water quality and iron oxide particles
Source: Royal Society of Chemistry journal article supplement (doi:10.1039/c9ew00257j), 2019-01-01

(a)

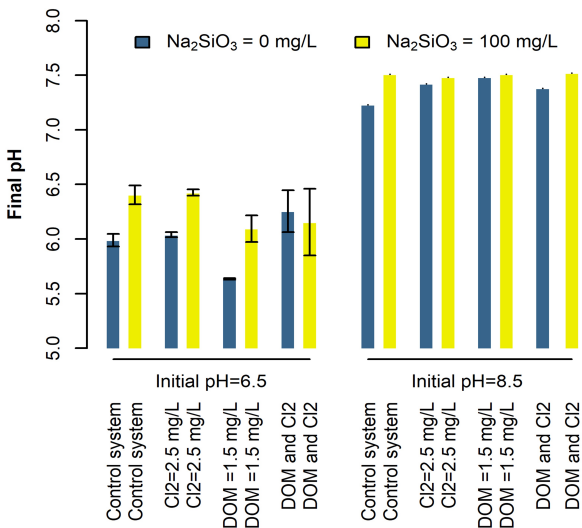

(b)

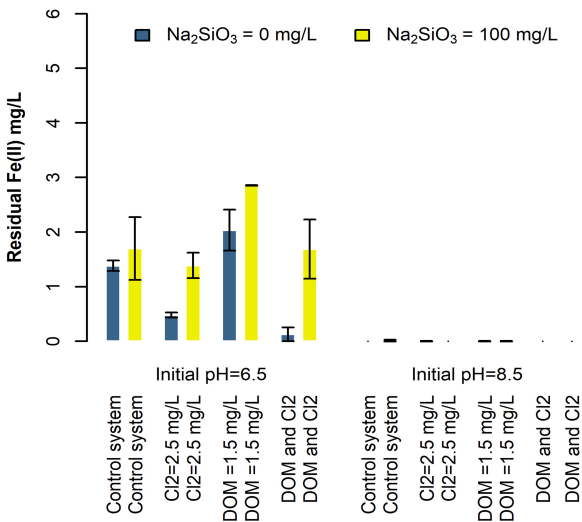

Supplement: c9ew00257j2.pdf [file c9ew00257j2.pdf]

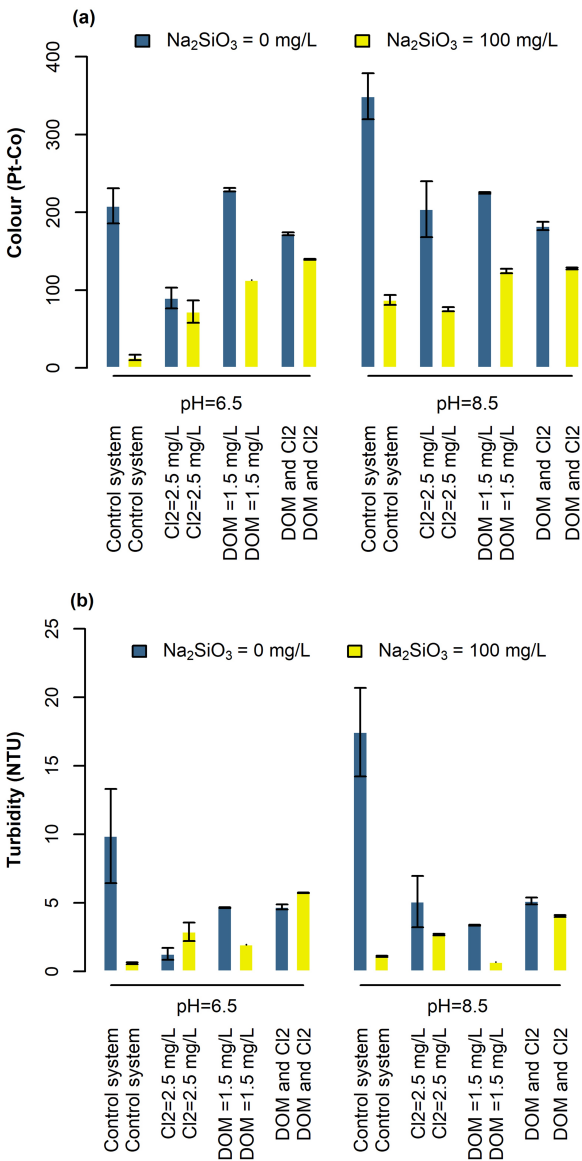

Supplement: c9ew00257j3.pdf [file c9ew00257j3.pdf]

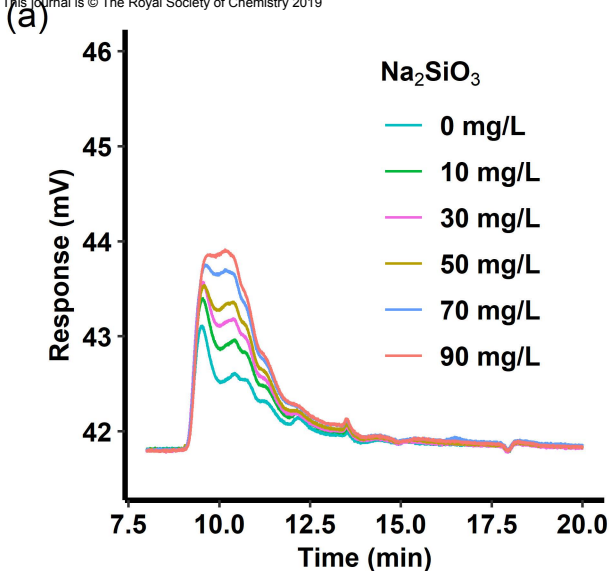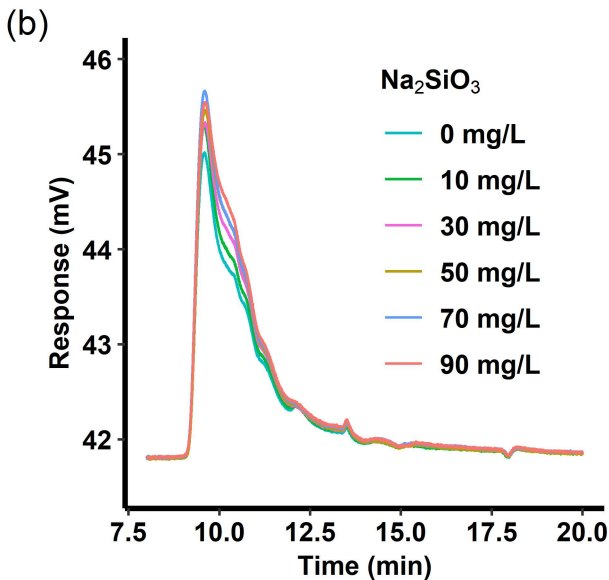

Supplement: c9ew00257j4.pdf [file c9ew00257j4.pdf]

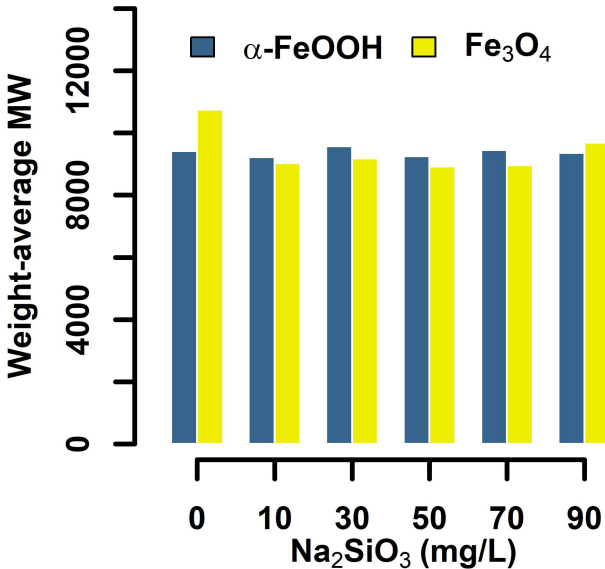

Supplement: c9ew00257j5.pdf [file c9ew00257j5.pdf]

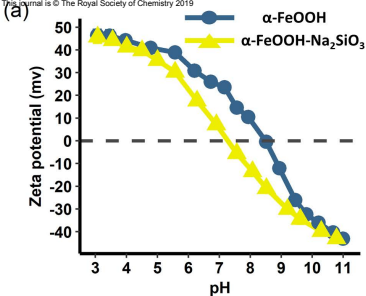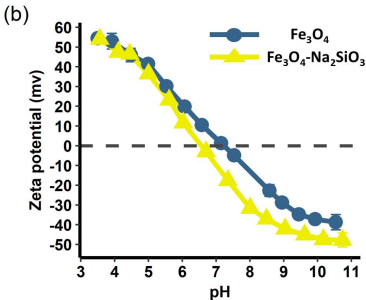

Supplement: c9ew00257j6.pdf [file c9ew00257j6.pdf]

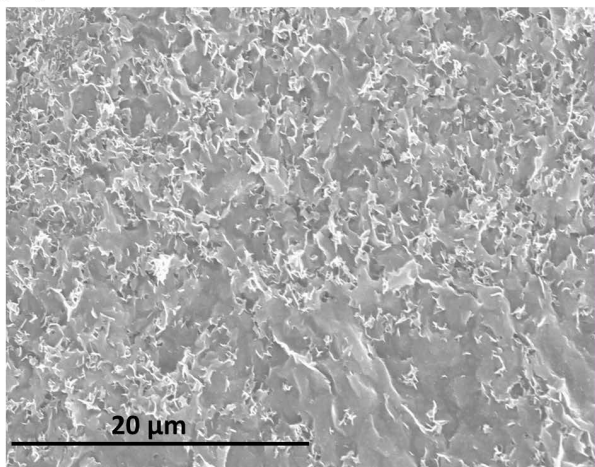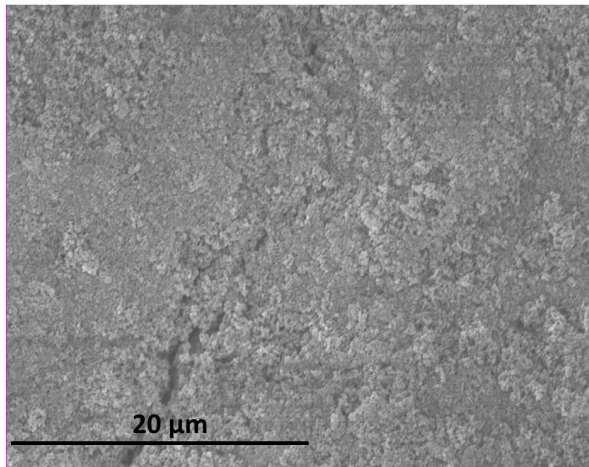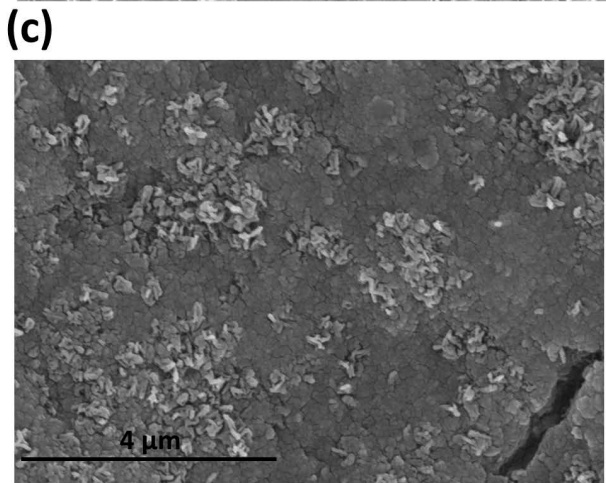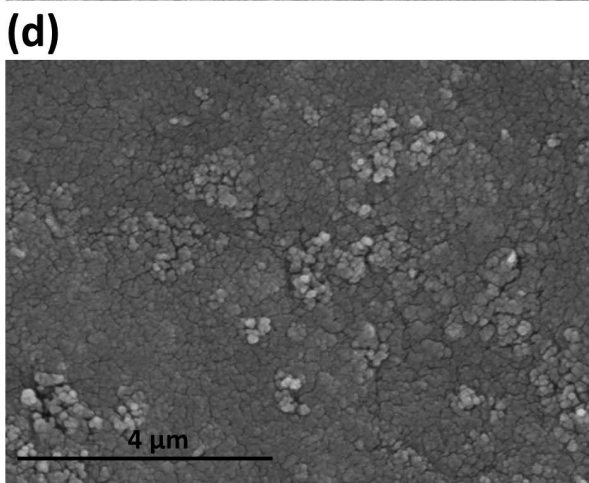

Supplement: c9ew00257j7.pdf [file c9ew00257j7.pdf]

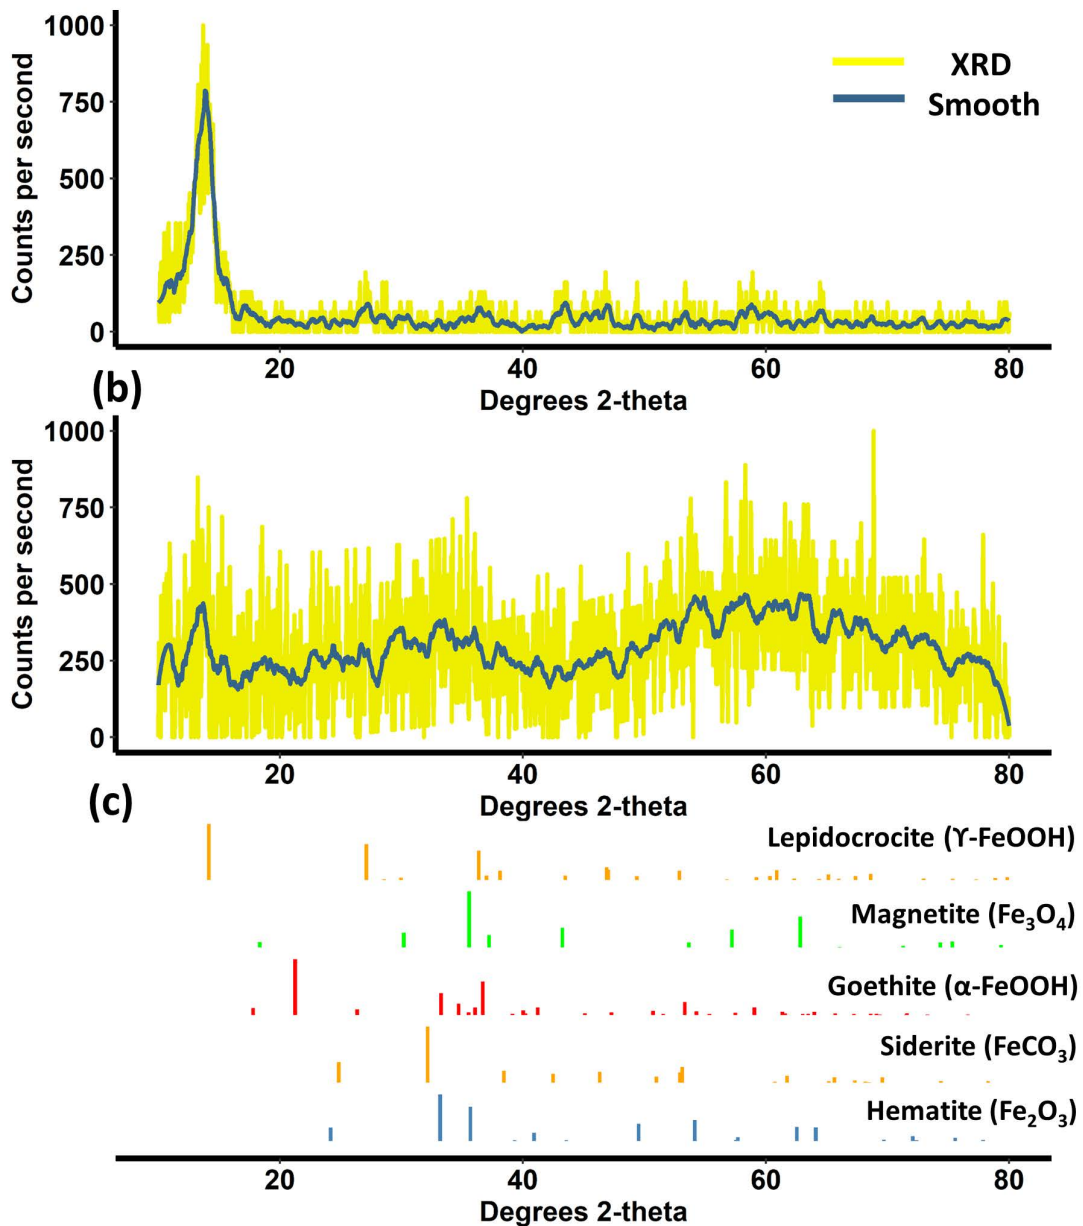

Supplement: c9ew00257j8.pdf [file c9ew00257j8.pdf]
